# Supplementary material for: Comprehensive Profiling of Tubby-Like Proteins in Soybean and Roles of the GmTLP8 Gene in Abiotic Stress Responses
Source: Frontiers journal article supplement (doi:10.3389/fpls.2022.844545), 2022-04-25
Supplement: Image_1.PDF [file Image_1.PDF]

| Motif | Symbol                                                                            | Motif Consensus                                      |
|-------|-----------------------------------------------------------------------------------|------------------------------------------------------|
| 1     |  | NPSAPEQEKVILQFGKVGKDJFTMDYRYPLSAFQAFAICLSSFDTKLACE   |
| 2     |  | LVLKNKAPRWHEQLQCWCLNFRGRVTVASVKNFQLVAATEP            |
| 3     |  | QSRWANLPPELLRDVIRRLASETTWPARKHVVACAAVCKSWREITKEIV    |
| 4     |  | KFLLAAKRTRRTTCTEYIISLDADBISRSSNTYVGKLRSNF            |
| 5     |  | PEFCGKITFPISLKQPGPRDSPIQCFIKRBKSTSTYYLFLGLSPALLVEN   |
| 6     |  | KQVSPKVPAGNYNVAQVSYELNVLGTRGPRRMHCVMH SIPASAI ZPGGVA |
| 7     |  | LGTKFTIYDSQPPHSGAKLSP                                |
| 8     |  | PGQPELLPRSLED SFRSISFSKSIDNSTEFSSSRFSDIFEAGIEDEEGKV  |
| 9     |  | SIVRELKEVRDGIGSLSRRGFEVRLWGGH                        |
| 10    |  | TPTSFPQIFDEPFSPSPALKGKGPIRDLDNASLPE                  |

**Supplementary Figure 1.** Consensus sequences for putative motifs.
