# Supplementary material for: Comprehensive Profiling of Tubby-Like Proteins in Soybean and Roles of the GmTLP8 Gene in Abiotic Stress Responses
Source: Frontiers journal article supplement (doi:10.3389/fpls.2022.844545), 2022-04-25
Supplement: Image_2.PDF [file Image_2.PDF]

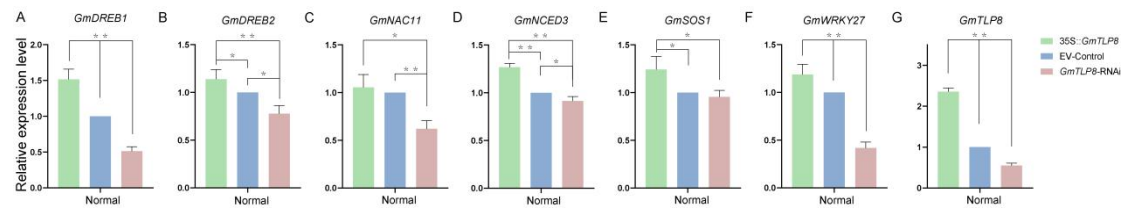

**Supplementary Figure 2.** Stress response gene expression in *GmTLP8* transgenic soybean hairy root complex plants under normal growth conditions. (A-F) Expression levels of selected stress-related genes in transgenic soybean plants under normal conditions. (G) Expression levels of *GmTLP8* in transgenic soybean plants under normal conditions. Vertical bars indicate  $\pm$  SD of three technical and three biological replicates. \* $p < 0.05$ , \*\* $p < 0.01$  (Student's *t*-test).
