# Supplementary material for: Comprehensive Profiling of Tubby-Like Proteins in Soybean and Roles of the GmTLP8 Gene in Abiotic Stress Responses
Source: Front Plant Sci. 2022 Apr 25;13:844545. doi: 10.3389/fpls.2022.844545 (PMC9083326; doi:10.3389/fpls.2022.844545)
Supplement: Supplementary file 1 [file Table_1.XLSX]

## Sheet: Sheet1
Supplement table 1. Analysis of cis-acting elements in soybean TLP family
Name		GmTLP1	GmTLP2	GmTLP3	GmTLP4	GmTLP5	GmTLP6	GmTLP7	GmTLP8	GmTLP9	GmTLP10	GmTLP11	GmTLP12	GmTLP13	GmTLP14	GmTLP15	GmTLP16	GmTLP17	GmTLP18	GmTLP19	GmTLP20	GmTLP21	GmTLP22	Total
ABA-responsive	ABRE	5	3	0	0	0	1	1	4	4	0	1	0	0	1	4	3	0	2	0	3	4	1	37
anaerobic induction	ARE	2	4	3	2	2	2	0	4	2	1	2	2	0	2	3	1	3	5	2	3	4	5	54
low-temperature responsiveness	LTR	0	0	1	0	0	0	0	0	0	0	1	0	1	1	0	1	0	0	1	1	0	0	7
defense and stresses responsiveness	TC-rich	0	0	0	1	0	0	1	0	0	0	1	0	0	1	0	1	1	0	0	0	0	0	6
MYB binding site involved in drought-inducibility	MBS	0	0	2	0	0	0	0	2	0	0	0	0	0	0	0	0	0	1	2	1	2	1	11
light response	MRE	1	1	1	0	0	1	0	2	2	0	0	0	0	2	0	0	2	0	2	0	0	2	16
	G-box	5	3	0	0	1	1	0	3	4	1	0	0	0	1	1	2	0	3	0	3	3	0	31
salicylic acid	TCA-element	0	2	1	1	0	0	0	1	0	0	0	1	0	1	2	1	0	1	1	0	3	0	15
Methyl Jasmonate	TGACG-motif	1	0	0	1	1	0	2	0	1	1	2	0	0	2	0	0	3	1	1	0	0	1	17
fungal elicitor responsive	W-box	0	1	1	0	2	1	0	3	0	1	1	0	0	0	2	0	0	0	1	0	2	2	17
Circadian Control	circadian	0	0	0	0	1	0	0	0	0	1	0	0	0	0	0	0	1	0	0	1	0	0	4
Cell Cycle	MSA-like	0	0	0	0	0	0	0	0	0	0	0	0	0	0	2	0	0	0	0	0	2	0	4
Zein Metabolism	O2-site	1	2	0	0	1	0	1	0	0	0	0	0	1	0	0	2	0	1	0	0	1	0	10
Gibberellin	TATC-box	1	0	0	1	0	0	1	0	0	0	0	0	0	2	0	0	0	0	0	0	0	0	5
Auxin	AuxRR-core	0	0	0	0	1	0	0	1	0	1	0	0	0	1	0	0	1	0	0	0	0	1	6
Meristem	CAT-box	0	1	0	0	0	0	0	1	1	0	0	0	0	0	0	1	1	0	1	1	1	1	9
Drought and salt-responsive	MYC	4	3	4	6	7	5	2	3	4	5	5	4	2	2	1	1	6	3	5	5	2	5	84
Total		20	20	13	12	16	11	8	24	18	11	13	7	4	16	15	13	18	17	16	18	24	19	333
