# Supplementary material for: Comprehensive Profiling of Tubby-Like Proteins in Soybean and Roles of the GmTLP8 Gene in Abiotic Stress Responses
Source: Front Plant Sci. 2022 Apr 25;13:844545. doi: 10.3389/fpls.2022.844545 (PMC9083326; doi:10.3389/fpls.2022.844545)
Supplement: Supplementary file 2 [file Table_2.XLSX]

## Sheet: Sheet1
Supplement table 2. Primers and sequences used for the experiments
Glyma10G224900-1302-F	5' GGGACTCTTGACCATG 3'ATGTCCTTCCGCAGT
Glyma10G224900-1302-R	5' TCAGATCTACCCATGG3'CTATTCACAAGCCAG
Glyma10G224900-3301-F	5' GGACTCTTGACCATG 3'ATGTCCTTCCGCAGT
Glyma10G224900-3301-R	5' ATTCGAGCTGGTCACC3'CTATTCACAAGCCAGTTT
Glyma10G224900-16318-F	5' TATCTCTAGAGGATCC3'ATGTCCTTCCGCAGT
Glyma10G224900-16318-R	5' TGCTCACCATGGATCC3'CTATTCACAAGCCAGTTT
Glyma.10G224900-F1	ATGTCCTTCCGCAGTATAGTT
Glyma.10G224900-R1	CTATTCACAAGCCAGTTTTGT
GmActin-qF	ACATTGTTCTTAGTGGTGGCT
GmActin-qR	CTGTTGGAAGGTGCTGAG
GmTLP8-qF	AACAGGGGCAAGTCACGTAG
GmTLP8-qR	CCTATGCCCAGGCTGTTTCA
GmTLP11-qF	ATGGGAATAATAATGGGTGGTCT
GmTLP11-qR	ACGTGGTCCTGGCTGTTTA
GmTLP13-qF	GGTCCAACATGCTTCCAGAGA
GmTLP13-qR	CACGTGGTCCTGGCTGCTTA
GmTLP19-qF	GGTCCATGAGGAGCACGAAT
GmTLP19-qR	GCTTACGAGCAGGCCATGTA
GmTLP22-qF	CCACCACCAGCCATTGTTACT
GmTLP22-qR	AATGCAGAGAGGGGGTATCG
GmDREB1-qF	GTCCGCTGATTCCATTC
GmDREB1-qR	AAGTCGGGCTTGAGATT
GmNAC11-qF	TCCCTCTTGTTCTATGCT
GmNAC11-qR	GTTTCCCATTATTTGCCTA
GmNCED3-qF	TGATCGCTCACCCCAAAGTC
GmNCED3-qR	ATCGTGCATCATGGTGGGTT
GmSOS1-qF	CACTGCTCAGGAGGGTTCAG
GmSOS1-qR	GAGAAGCAAGAGGTGGGTCC
GmDREB2-qF	AGCGAAAGCAGCAGCACC
GmDREB2-qR	GTTAAGGCGAGCGGAAGG
GmWRKY27-qF	TCTCTGTGAGCATTTCGGTTA
GmWRKY27-qR	CATTGGATTTGGAGGTGAAGA
>GmTLP8-RNAi fragment	catgCCATGGTGCCCTTGAGGATTCTTTCCGGAGTATATCCTTCTCAAAATCAATCGACAATTCAACCGAGTTTAGCAGCTCTAGGTTCTCTGACATAATGGGAACTGGCATTGAAGACGAGGAGGGAAAGGTGAGACCACTAGTTCTCAAGAACAAGTCTCCAAGGTGGCATGAACAGCTGCAATGTTGGTGCCTCAACTTTAGAGGAAGATCCGATCGAAAAACGGGAGTCTGCCCCTAAGACAGATAAGCCGCCAAGAAGGCGCAAGTCAACCGCGAGTTGTTGTATCATATCTACTGACAAAGATCACAAATGGGATGGCTGATTAGATACCTTGGCCTCCCAGATCGATTCTTCCTCTAAAGTTGAGGCACCAACATTGCAGCTGTTCATGCCA…
>GmTLP8-peptide sequence	MSFRSIVREVRDGFGSLSRRSFEVRLPGHNRGKSRSLVHELQDQPPVIQNSRWASLPPELLRDVINRLEASESTWPGRKHVVACAAVCKSWREMCKEIVS
	SPEFCGKITFPVSLKQPGHRDGPIQCFIKRDKSKLTYHLFLGLSPALLVENGKFLLSAKRTRRTTCTEYVISMDADNISRSSSTYIGKLRSNFLGTKFII
	YDTQPPYNNAMLSPPGRSRRFSKKVSPKVPSGSYNIAQVTYELNVLGTRGPRRMNCTMYSIPASSMEPNGVVPGQPELLPRALEDSFRSISFSKSIDNST
	EFSSSRFSDIMGTGIEDEEGKVRPLVLKNKSPRWHEQLQCWCLNFRGRVTVASVKNFQLIASTPPAAVAPTGTGPTPSQPTQSSSDPDKIILQFGKVGKD
	MFTMDYRYPLSAFQAFAICLTSFDTKLACE*
