# Supplementary material for: Comprehensive Profiling of Tubby-Like Proteins in Soybean and Roles of the GmTLP8 Gene in Abiotic Stress Responses
Source: Front Plant Sci. 2022 Apr 25;13:844545. doi: 10.3389/fpls.2022.844545 (PMC9083326; doi:10.3389/fpls.2022.844545)
Supplement: Supplementary file 3 [file Table_3.xlsx]

## Sheet: ABA
Supplement table 3. Transcriptome data under abiotic stress.
GeneID	Length	Normal_treat-Expression	ABA_treat-Expression	log2FoldChange(ABA_treat/CK_treat)	Padj	Up/Down-Regulation	Pvalue	Name	Symbol	Gene ID	Cellular Component	Molecular Function	Biological Process	Kegg Orthology	Nr Description
100798958	2007	814.309	982.782	0.271296	0.00584935	*	0.00177436	GmTLP1	LOC100798958	GLYMA_01G173700	NA	GO:0003824//catalytic activity	NA	K19600//tubby-related protein 1	gi|356496747|ref|XP_003517227.1|//PREDICTED: tubby-like F-box protein 5 [Glycine max]
100805380	1705	2092.55	2290.12	0.130155	0.05184	*	0.0204507	GmTLP2	LOC100805380	GLYMA_02G055300	NA	NA	NA	K19600//tubby-related protein 1	gi|571438874|ref|XP_006574698.1|//PREDICTED: tubby-like F-box protein 2 [Glycine max]
100799499	1780	637.397	590.437	-0.110409	0.505386	*	0.326023	GmTLP3	LOC100799499	GLYMA_02G081800	NA	GO:0003824//catalytic activity	NA	K19600//tubby-related protein 1	gi|356499542|ref|XP_003518598.1|//PREDICTED: tubby-like F-box protein 8 [Glycine max]
100809257	2008	2112.5	2203.23	0.060667	0.542228	*	0.360472	GmTLP4	LOC100809257	GLYMA_02G152700	GO:0005929//cilium	GO:0035091//phosphatidylinositol binding	GO:0061512//protein localization to cilium	K19600//tubby-related protein 1;K10808//ribonucleoside-diphosphate reductase subunit M2 [EC:1.17.4.1]	gi|571438060|ref|XP_006574455.1|//PREDICTED: uncharacterized protein LOC100809257 isoform X1 [Glycine max];gi|734433037|gb|KHN46594.1|//Tubby-like F-box protein 3 [Glycine soja];gi|363806828|ref|NP_001242033.1|//uncharacterized protein LOC100809257 [Glycine max]
100777316	4701	1123.06	1115.76	-0.0094197	0.946415	*	0.898802	GmTLP5	LOC100777316	GLYMA_07G147700	GO:0005929//cilium	GO:0004491//methylmalonate-semialdehyde dehydrogenase (acylating) activity;GO:0003824//catalytic activity;GO:0035091//phosphatidylinositol binding	GO:0006355//regulation of transcription, DNA-templated;GO:0061512//protein localization to cilium;GO:0055114//oxidation-reduction process	K11423//histone-lysine N-methyltransferase SETD2 [EC:2.1.1.43];K12396//AP-3 complex subunit delta	gi|734316648|gb|KHN02162.1|//Protein FAR1-RELATED SEQUENCE 6, partial [Glycine soja];gi|734406176|gb|KHN33887.1|//Tubby-like F-box protein 8 [Glycine soja];gi|955331159|ref|XP_014633492.1|//PREDICTED: tubby-like F-box protein 8 isoform X1 [Glycine max]
100794141	1736	147.013	107.222	-0.455347	0.147075	*	0.0684716	GmTLP6	LOC100794141	GLYMA_07G251800	NA	NA	NA	K19600//tubby-related protein 1	gi|356521909|ref|XP_003529593.1|//PREDICTED: tubby-like F-box protein 3 [Glycine max]
100799279	1995	841.415	800.639	-0.0716655	0.586586	*	0.405282	GmTLP7	LOC100799279	GLYMA_08G183100	GO:0005929//cilium	GO:0035091//phosphatidylinositol binding	GO:0061512//protein localization to cilium	K19600//tubby-related protein 1	gi|356525920|ref|XP_003531569.1|//PREDICTED: tubby-like F-box protein 8 [Glycine max]
100810531	1868	875.094	886.557	0.0187746	0.894613	*	0.819987	GmTLP8	LOC100810531	GLYMA_10G224900	NA	GO:0003824//catalytic activity	NA	K19600//tubby-related protein 1	gi|571480901|ref|XP_006588484.1|//PREDICTED: uncharacterized protein LOC100810531 isoform X1 [Glycine max];gi|363806718|ref|NP_001242014.1|//uncharacterized protein LOC100810531 [Glycine max]
100778290	2271	1404.47	1297.57	-0.114219	0.261009	*	0.137837	GmTLP9	LOC100778290	GLYMA_11G069400	NA	GO:0003824//catalytic activity	NA	K19600//tubby-related protein 1	gi|734423046|gb|KHN41967.1|//Tubby-like F-box protein 5 [Glycine soja]
100808096	1528	973.086	1101.83	0.179264	0.0505131	*	0.0198652	GmTLP11	LOC100808096	GLYMA_12G230000	NA	NA	NA	K19600//tubby-related protein 1	gi|356544096|ref|XP_003540491.1|//PREDICTED: tubby-like F-box protein 7 [Glycine max]
100778346	2275	1197.6	1098.28	-0.124901	0.210231	*	0.105779	GmTLP12	LOC100778346	GLYMA_13G214900	NA	GO:0003824//catalytic activity	NA	K19600//tubby-related protein 1;K10808//ribonucleoside-diphosphate reductase subunit M2 [EC:1.17.4.1]	gi|356549056|ref|XP_003542914.1|//PREDICTED: tubby-like F-box protein 3 [Glycine max]
100801919	1482	1090.95	1398.09	0.357878	2.34436e-06	*	4.15674e-07	GmTLP13	LOC100801919	GLYMA_13G269600	NA	NA	NA	K19600//tubby-related protein 1	gi|356549655|ref|XP_003543207.1|//PREDICTED: tubby-like F-box protein 7 [Glycine max]
100803500	1601	1476.12	427.332	-1.78838	2.05823e-80	Down	2.34064e-82	GmTLP14	LOC100803500	GLYMA_13G371500	NA	NA	NA	K19600//tubby-related protein 1	gi|571504058|ref|XP_003543712.2|//PREDICTED: tubby-like protein 8 [Glycine max]
100796250	1910	124.298	144.39	0.216167	0.508808	*	0.329045	GmTLP15	LOC100796250	GLYMA_14G073500	NA	NA	NA	K19600//tubby-related protein 1	gi|356552095|ref|XP_003544406.1|//PREDICTED: tubby-like F-box protein 5 [Glycine max]
100814578	2153	1540.33	1466.64	-0.0707254	0.444551	*	0.27268	GmTLP16	LOC100814578	GLYMA_15G049500	GO:0005929//cilium	GO:0035091//phosphatidylinositol binding	GO:0061512//protein localization to cilium	K19600//tubby-related protein 1	gi|571515999|ref|XP_006597337.1|//PREDICTED: tubby-like F-box protein 8 [Glycine max]
100815464	2549	1919.05	1557.41	-0.301243	2.54764e-05	*	5.16527e-06	GmTLP17	LOC100815464	GLYMA_15G098200	GO:0005929//cilium	GO:0003824//catalytic activity;GO:0035091//phosphatidylinositol binding	GO:0061512//protein localization to cilium	K19600//tubby-related protein 1;K10808//ribonucleoside-diphosphate reductase subunit M2 [EC:1.17.4.1]	gi|955370957|ref|XP_014623297.1|//PREDICTED: tubby-like F-box protein 6 isoform X2 [Glycine max];gi|356555565|ref|XP_003546101.1|//PREDICTED: tubby-like F-box protein 3 isoform X1 [Glycine max];gi|734404603|gb|KHN33114.1|//Tubby-like F-box protein 6, partial [Glycine soja]
100777506	1700	345.129	353.234	0.0334861	0.875993	*	0.790981	GmTLP18	LOC100777506	GLYMA_16G138100	NA	GO:0003824//catalytic activity	NA	K19600//tubby-related protein 1	gi|358248100|ref|NP_001239813.1|//uncharacterized protein LOC100777506 [Glycine max]
100803729	1801	752.789	754.191	0.00268359	0.988896	*	0.975527	GmTLP19	LOC100803729	GLYMA_16G167200	NA	GO:0003824//catalytic activity	NA	K19600//tubby-related protein 1	gi|363808054|ref|NP_001242468.1|//uncharacterized protein LOC100803729 [Glycine max];gi|571524097|ref|XP_006598751.1|//PREDICTED: uncharacterized protein LOC100803729 isoform X1 [Glycine max]
100805161	1704	344.666	418.61	0.280409	0.0566076	*	0.0225659	GmTLP20	LOC100805161	GLYMA_17G022700	NA	NA	NA	K19600//tubby-related protein 1	gi|358248257|ref|NP_001239849.1|//uncharacterized protein LOC100805161 [Glycine max]
100794899	2012	177.48	428.771	1.27255	5.50716e-14	Up	4.90164e-15	GmTLP21	LOC100794899	GLYMA_17G251500	NA	NA	NA	K19600//tubby-related protein 1	gi|571539572|ref|XP_006601316.1|//PREDICTED: tubby-like F-box protein 5 isoform X1 [Glycine max];gi|947056383|gb|KRH05836.1|//hypothetical protein GLYMA_17G251500 [Glycine max];gi|571539576|ref|XP_006601317.1|//PREDICTED: tubby-like F-box protein 5 isoform X2 [Glycine max]
100817532	1927	641.701	790.673	0.301179	0.00345242	*	0.000999159	GmTLP22	LOC100817532	GLYMA_20G166900	NA	GO:0003824//catalytic activity	NA	K19600//tubby-related protein 1	gi|356576061|ref|XP_003556153.1|//PREDICTED: tubby-like F-box protein 8 [Glycine max]

## Sheet: Drought
Supplement table 3. Transcriptome data under abiotic stress.
GeneID	Length	Normal_treat-Expression	Drought_treat-Expression	log2FoldChange(GH_treat/CK_treat)	Padj	Up/Down-Regulation	Pvalue	Name	Symbol	Gene ID	Cellular Component	Molecular Function	Biological Process	Kegg Orthology	Nr Description
100777316	4771	949.729	1284.89	0.43606	9.37e-09	*	4.18e-09	GmTLP5	LOC100777316	GLYMA_07G147700	GO:0005929//cilium	GO:0004491//methylmalonate-semialdehyde dehydrogenase (acylating) activity;GO:0003824//catalytic activity;GO:0035091//phosphatidylinositol binding	GO:0006355//regulation of transcription, DNA-templated;GO:0061512//protein localization to cilium;GO:0055114//oxidation-reduction process	K11423//histone-lysine N-methyltransferase SETD2 [EC:2.1.1.43];K12396//AP-3 complex subunit delta	gi|734316648|gb|KHN02162.1|//Protein FAR1-RELATED SEQUENCE 6, partial [Glycine soja];gi|734406176|gb|KHN33887.1|//Tubby-like F-box protein 8 [Glycine soja];gi|955331159|ref|XP_014633492.1|//PREDICTED: tubby-like F-box protein 8 isoform X1 [Glycine max]
100777506	1700	291.562	42.2063	-2.78827	1.67e-31	Down	4.26e-32	GmTLP18	LOC100777506	GLYMA_16G138100	NA	GO:0003824//catalytic activity	NA	K19600//tubby-related protein 1	gi|358248100|ref|NP_001239813.1|//uncharacterized protein LOC100777506 [Glycine max]
100778290	2348	1187.77	707.744	-0.746951	2.56e-15	*	9.23e-16	GmTLP9	LOC100778290	GLYMA_11G069400	NA	GO:0003824//catalytic activity	NA	K19600//tubby-related protein 1	gi|734423046|gb|KHN41967.1|//Tubby-like F-box protein 5 [Glycine soja]
100778346	2275	1012.63	767.278	-0.400279	1.59e-05	*	8.24e-06	GmTLP12	LOC100778346	GLYMA_13G214900	NA	GO:0003824//catalytic activity	NA	K19600//tubby-related protein 1;K10808//ribonucleoside-diphosphate reductase subunit M2 [EC:1.17.4.1]	gi|356549056|ref|XP_003542914.1|//PREDICTED: tubby-like F-box protein 3 [Glycine max]
100794141	1737	124.727	110.576	-0.173739	0.50827	*	0.445919	GmTLP6	LOC100794141	GLYMA_07G251800	NA	NA	NA	K19600//tubby-related protein 1	gi|356521909|ref|XP_003529593.1|//PREDICTED: tubby-like F-box protein 3 [Glycine max]
100794899	2147	149.096	92.5947	-0.687241	0.0139017	*	0.00902947	GmTLP21	LOC100794899	GLYMA_17G251500	NA	NA	NA	K19600//tubby-related protein 1	gi|571539572|ref|XP_006601316.1|//PREDICTED: tubby-like F-box protein 5 isoform X1 [Glycine max];gi|947056383|gb|KRH05836.1|//hypothetical protein GLYMA_17G251500 [Glycine max];gi|571539576|ref|XP_006601317.1|//PREDICTED: tubby-like F-box protein 5 isoform X2 [Glycine max]
100796250	2007	104.706	43.255	-1.2754	0.000102283	Down	5.59e-05	GmTLP15	LOC100796250	GLYMA_14G073500	NA	NA	NA	K19600//tubby-related protein 1	gi|356552095|ref|XP_003544406.1|//PREDICTED: tubby-like F-box protein 5 [Glycine max]
100798958	1998	688.434	1035.78	0.58933	8.73e-11	*	3.61e-11	GmTLP1	LOC100798958	GLYMA_01G173700	NA	GO:0003824//catalytic activity	NA	K19600//tubby-related protein 1	gi|356496747|ref|XP_003517227.1|//PREDICTED: tubby-like F-box protein 5 [Glycine max]
100799279	2038	711.554	515.4	-0.465281	4.59e-06	*	2.32e-06	GmTLP7	LOC100799279	GLYMA_08G183100	GO:0005929//cilium	GO:0035091//phosphatidylinositol binding	GO:0061512//protein localization to cilium	K19600//tubby-related protein 1	gi|356525920|ref|XP_003531569.1|//PREDICTED: tubby-like F-box protein 8 [Glycine max]
100799499	1813	539.469	1492.71	1.46832	5.45e-50	Up	1.04e-50	GmTLP3	LOC100799499	GLYMA_02G081800	NA	GO:0003824//catalytic activity	NA	K19600//tubby-related protein 1	gi|356499542|ref|XP_003518598.1|//PREDICTED: tubby-like F-box protein 8 [Glycine max]
100801919	1482	922.316	2029.95	1.13811	2.63e-65	Up	4.15e-66	GmTLP13	LOC100801919	GLYMA_13G269600	NA	NA	NA	K19600//tubby-related protein 1	gi|356549655|ref|XP_003543207.1|//PREDICTED: tubby-like F-box protein 7 [Glycine max]
100803500	1601	1249.21	3.85895	-8.33859	2.14e-51	Down	4e-52	GmTLP14	LOC100803500	GLYMA_13G371500	NA	NA	NA	K19600//tubby-related protein 1	gi|571504058|ref|XP_003543712.2|//PREDICTED: tubby-like protein 8 [Glycine max]
100803729	1782	636.646	2137.38	1.74728	3.71e-126	Up	3.33e-127	GmTLP19	LOC100803729	GLYMA_16G167200	NA	GO:0003824//catalytic activity	NA	K19600//tubby-related protein 1	gi|363808054|ref|NP_001242468.1|//uncharacterized protein LOC100803729 [Glycine max];gi|571524097|ref|XP_006598751.1|//PREDICTED: uncharacterized protein LOC100803729 isoform X1 [Glycine max]
100805161	1701	291.025	94.8354	-1.61765	1.54e-17	Down	5.23e-18	GmTLP20	LOC100805161	GLYMA_17G022700	NA	NA	NA	K19600//tubby-related protein 1	gi|358248257|ref|NP_001239849.1|//uncharacterized protein LOC100805161 [Glycine max]
100805380	1705	1769.37	1810.96	0.0335168	0.664907	*	0.616711	GmTLP2	LOC100805380	GLYMA_02G055300	NA	NA	NA	K19600//tubby-related protein 1	gi|571438874|ref|XP_006574698.1|//PREDICTED: tubby-like F-box protein 2 [Glycine max]
100808096	1528	822.973	2704.23	1.7163	1.62e-147	Up	1.25e-148	GmTLP11	LOC100808096	GLYMA_12G230000	NA	NA	NA	K19600//tubby-related protein 1	gi|356544096|ref|XP_003540491.1|//PREDICTED: tubby-like F-box protein 7 [Glycine max]
100809257	2006	1786.27	989.257	-0.852534	3.08e-23	*	9.19e-24	GmTLP4	LOC100809257	GLYMA_02G152700	GO:0005929//cilium	GO:0035091//phosphatidylinositol binding	GO:0061512//protein localization to cilium	K19600//tubby-related protein 1;K10808//ribonucleoside-diphosphate reductase subunit M2 [EC:1.17.4.1]	gi|571438060|ref|XP_006574455.1|//PREDICTED: uncharacterized protein LOC100809257 isoform X1 [Glycine max];gi|734433037|gb|KHN46594.1|//Tubby-like F-box protein 3 [Glycine soja];gi|363806828|ref|NP_001242033.1|//uncharacterized protein LOC100809257 [Glycine max]
100810531	1868	740.085	2603.81	1.81486	1.18e-148	Up	8.97e-150	GmTLP8	LOC100810531	GLYMA_10G224900	NA	GO:0003824//catalytic activity	NA	K19600//tubby-related protein 1	gi|571480901|ref|XP_006588484.1|//PREDICTED: uncharacterized protein LOC100810531 isoform X1 [Glycine max];gi|363806718|ref|NP_001242014.1|//uncharacterized protein LOC100810531 [Glycine max]
100814578	2167	1302.6	1726.37	0.406348	1.52e-09	*	6.58e-10	GmTLP16	LOC100814578	GLYMA_15G049500	GO:0005929//cilium	GO:0035091//phosphatidylinositol binding	GO:0061512//protein localization to cilium	K19600//tubby-related protein 1	gi|571515999|ref|XP_006597337.1|//PREDICTED: tubby-like F-box protein 8 [Glycine max]
100815464	2721	1623.04	1291.7	-0.32943	1.3e-06	*	6.37e-07	GmTLP17	LOC100815464	GLYMA_15G098200	GO:0005929//cilium	GO:0003824//catalytic activity;GO:0035091//phosphatidylinositol binding	GO:0061512//protein localization to cilium	K19600//tubby-related protein 1;K10808//ribonucleoside-diphosphate reductase subunit M2 [EC:1.17.4.1]	gi|955370957|ref|XP_014623297.1|//PREDICTED: tubby-like F-box protein 6 isoform X2 [Glycine max];gi|356555565|ref|XP_003546101.1|//PREDICTED: tubby-like F-box protein 3 isoform X1 [Glycine max];gi|734404603|gb|KHN33114.1|//Tubby-like F-box protein 6, partial [Glycine soja]
100817532	1930	542.667	2212.86	2.02777	5.54e-133	Up	4.71e-134	GmTLP22	LOC100817532	GLYMA_20G166900	NA	GO:0003824//catalytic activity	NA	K19600//tubby-related protein 1	gi|356576061|ref|XP_003556153.1|//PREDICTED: tubby-like F-box protein 8 [Glycine max]

## Sheet: NaCl
Supplement table 3. Transcriptome data under abiotic stress.
GeneID	Length	Normal_treat-Expression	NaCl_treat-Expression	log2FoldChange(NaCl_treat/CK_treat)	Padj	Up/Down-Regulation	Pvalue	Name	Symbol	Gene ID	Cellular Component	Molecular Function	Biological Process	Kegg Orthology	Nr Description
100777316	4756	1065.43	1166.21	0.130386	0.293982	*	0.170805	GmTLP5	LOC100777316	GLYMA_07G147700	GO:0005929//cilium	GO:0004491//methylmalonate-semialdehyde dehydrogenase (acylating) activity;GO:0003824//catalytic activity;GO:0035091//phosphatidylinositol binding	GO:0006355//regulation of transcription, DNA-templated;GO:0061512//protein localization to cilium;GO:0055114//oxidation-reduction process	K11423//histone-lysine N-methyltransferase SETD2 [EC:2.1.1.43];K12396//AP-3 complex subunit delta	gi|734316648|gb|KHN02162.1|//Protein FAR1-RELATED SEQUENCE 6, partial [Glycine soja];gi|734406176|gb|KHN33887.1|//Tubby-like F-box protein 8 [Glycine soja];gi|955331159|ref|XP_014633492.1|//PREDICTED: tubby-like F-box protein 8 isoform X1 [Glycine max]
100777506	1700	326.763	177.198	-0.882884	1.45e-05	*	3.49e-06	GmTLP18	LOC100777506	GLYMA_16G138100	NA	GO:0003824//catalytic activity	NA	K19600//tubby-related protein 1	gi|358248100|ref|NP_001239813.1|//uncharacterized protein LOC100777506 [Glycine max]
100778290	2315	1332.32	1198.49	-0.152725	0.247095	*	0.138045	GmTLP9	LOC100778290	GLYMA_11G069400	NA	GO:0003824//catalytic activity	NA	K19600//tubby-related protein 1	gi|734423046|gb|KHN41967.1|//Tubby-like F-box protein 5 [Glycine soja]
100778346	2275	1135.75	951.831	-0.254871	0.0394157	*	0.0167536	GmTLP12	LOC100778346	GLYMA_13G214900	NA	GO:0003824//catalytic activity	NA	K19600//tubby-related protein 1;K10808//ribonucleoside-diphosphate reductase subunit M2 [EC:1.17.4.1]	gi|356549056|ref|XP_003542914.1|//PREDICTED: tubby-like F-box protein 3 [Glycine max]
100794141	1738	139.975	145.129	0.0521668	0.896166	*	0.831209	GmTLP6	LOC100794141	GLYMA_07G251800	NA	NA	NA	K19600//tubby-related protein 1	gi|356521909|ref|XP_003529593.1|//PREDICTED: tubby-like F-box protein 3 [Glycine max]
100794899	2019	167.486	185.79	0.149635	0.709582	*	0.553117	GmTLP21	LOC100794899	GLYMA_17G251500	NA	NA	NA	K19600//tubby-related protein 1	gi|571539572|ref|XP_006601316.1|//PREDICTED: tubby-like F-box protein 5 isoform X1 [Glycine max];gi|947056383|gb|KRH05836.1|//hypothetical protein GLYMA_17G251500 [Glycine max];gi|571539576|ref|XP_006601317.1|//PREDICTED: tubby-like F-box protein 5 isoform X2 [Glycine max]
100796250	1969	117.297	86.2176	-0.444111	0.285989	*	0.165151	GmTLP15	LOC100796250	GLYMA_14G073500	NA	NA	NA	K19600//tubby-related protein 1	gi|356552095|ref|XP_003544406.1|//PREDICTED: tubby-like F-box protein 5 [Glycine max]
100798958	2012	772.297	763.959	-0.0156603	0.938846	*	0.894688	GmTLP1	LOC100798958	GLYMA_01G173700	NA	GO:0003824//catalytic activity	NA	K19600//tubby-related protein 1	gi|356496747|ref|XP_003517227.1|//PREDICTED: tubby-like F-box protein 5 [Glycine max]
100799279	2026	798.025	663.809	-0.265665	0.0721655	*	0.0330676	GmTLP7	LOC100799279	GLYMA_08G183100	GO:0005929//cilium	GO:0035091//phosphatidylinositol binding	GO:0061512//protein localization to cilium	K19600//tubby-related protein 1	gi|356525920|ref|XP_003531569.1|//PREDICTED: tubby-like F-box protein 8 [Glycine max]
100799499	1806	604.817	687.067	0.183952	0.326922	*	0.194555	GmTLP3	LOC100799499	GLYMA_02G081800	NA	GO:0003824//catalytic activity	NA	K19600//tubby-related protein 1	gi|356499542|ref|XP_003518598.1|//PREDICTED: tubby-like F-box protein 8 [Glycine max]
100801919	1482	1034.83	1173.74	0.18172	0.195717	*	0.104735	GmTLP13	LOC100801919	GLYMA_13G269600	NA	NA	NA	K19600//tubby-related protein 1	gi|356549655|ref|XP_003543207.1|//PREDICTED: tubby-like F-box protein 7 [Glycine max]
100803500	1601	1400.42	306.006	-2.19423	3.67e-67	Down	9.79e-69	GmTLP14	LOC100803500	GLYMA_13G371500	NA	NA	NA	K19600//tubby-related protein 1	gi|571504058|ref|XP_003543712.2|//PREDICTED: tubby-like protein 8 [Glycine max]
100803729	1797	714.668	1127.54	0.657833	2.48e-08	*	4.61e-09	GmTLP19	LOC100803729	GLYMA_16G167200	NA	GO:0003824//catalytic activity	NA	K19600//tubby-related protein 1	gi|363808054|ref|NP_001242468.1|//uncharacterized protein LOC100803729 [Glycine max];gi|571524097|ref|XP_006598751.1|//PREDICTED: uncharacterized protein LOC100803729 isoform X1 [Glycine max]
100805161	1701	326.374	241.385	-0.43519	0.0337356	*	0.0140906	GmTLP20	LOC100805161	GLYMA_17G022700	NA	NA	NA	K19600//tubby-related protein 1	gi|358248257|ref|NP_001239849.1|//uncharacterized protein LOC100805161 [Glycine max]
100805380	1705	1985.04	2186.28	0.139309	0.158831	*	0.0819815	GmTLP2	LOC100805380	GLYMA_02G055300	NA	NA	NA	K19600//tubby-related protein 1	gi|571438874|ref|XP_006574698.1|//PREDICTED: tubby-like F-box protein 2 [Glycine max]
100808096	1528	923.195	1194.23	0.37137	0.0029765	*	0.000994757	GmTLP11	LOC100808096	GLYMA_12G230000	NA	NA	NA	K19600//tubby-related protein 1	gi|356544096|ref|XP_003540491.1|//PREDICTED: tubby-like F-box protein 7 [Glycine max]
100809257	2007	2003.98	2014.07	0.00724802	0.968048	*	0.934476	GmTLP4	LOC100809257	GLYMA_02G152700	GO:0005929//cilium	GO:0035091//phosphatidylinositol binding	GO:0061512//protein localization to cilium	K19600//tubby-related protein 1;K10808//ribonucleoside-diphosphate reductase subunit M2 [EC:1.17.4.1]	gi|571438060|ref|XP_006574455.1|//PREDICTED: uncharacterized protein LOC100809257 isoform X1 [Glycine max];gi|734433037|gb|KHN46594.1|//Tubby-like F-box protein 3 [Glycine soja];gi|363806828|ref|NP_001242033.1|//uncharacterized protein LOC100809257 [Glycine max]
100810531	1830	830.967	1769.27	1.09029	3.04e-29	Up	1.97e-30	GmTLP8	LOC100810531	GLYMA_10G224900	NA	GO:0003824//catalytic activity	NA	K19600//tubby-related protein 1	gi|571480901|ref|XP_006588484.1|//PREDICTED: uncharacterized protein LOC100810531 isoform X1 [Glycine max];gi|363806718|ref|NP_001242014.1|//uncharacterized protein LOC100810531 [Glycine max]
100814578	2166	1461.09	1389.22	-0.0727688	0.64547	*	0.47913	GmTLP16	LOC100814578	GLYMA_15G049500	GO:0005929//cilium	GO:0035091//phosphatidylinositol binding	GO:0061512//protein localization to cilium	K19600//tubby-related protein 1	gi|571515999|ref|XP_006597337.1|//PREDICTED: tubby-like F-box protein 8 [Glycine max]
100815464	2682	1820.66	1768.25	-0.0421422	0.749407	*	0.597788	GmTLP17	LOC100815464	GLYMA_15G098200	GO:0005929//cilium	GO:0003824//catalytic activity;GO:0035091//phosphatidylinositol binding	GO:0061512//protein localization to cilium	K19600//tubby-related protein 1;K10808//ribonucleoside-diphosphate reductase subunit M2 [EC:1.17.4.1]	gi|955370957|ref|XP_014623297.1|//PREDICTED: tubby-like F-box protein 6 isoform X2 [Glycine max];gi|356555565|ref|XP_003546101.1|//PREDICTED: tubby-like F-box protein 3 isoform X1 [Glycine max];gi|734404603|gb|KHN33114.1|//Tubby-like F-box protein 6, partial [Glycine soja]
100817532	1933	609.035	1014.64	0.736376	2.9e-10	*	4.61e-11	GmTLP22	LOC100817532	GLYMA_20G166900	NA	GO:0003824//catalytic activity	NA	K19600//tubby-related protein 1	gi|356576061|ref|XP_003556153.1|//PREDICTED: tubby-like F-box protein 8 [Glycine max]
